# Supplementary material
Source: PubMed Central journal article supplement (PMC7425327)
Supplement: Supplemental_Material_B_-_Putative_Harmonized_Items_and_Parameters.pdf [file Supplemental_Material_B_-_Putative_Harmonized_Items_and_Parameters.pdf]

**Supplemental Material B.** Putatively harmonized Item names, item descriptions, model modifications, and item-response theory parameter estimates for pre-alignment and post-alignment data.

| Item Name | Item Description                                                     |
|-----------|----------------------------------------------------------------------|
| DEP1      | Dysphoria $\geq 2$ weeks                                             |
| DEP2      | Dysphoria $\geq 2$ weeks (screener)                                  |
| DEP5      | Dysphoric mood (depression)                                          |
| DEP6      | Anhedonia $\geq 2$ weeks                                             |
| DEP7      | Anhedonia $\geq 2$ weeks (screener)                                  |
| DEP8      | Ever had dysphoria $\geq 1$ week                                     |
| DEP9      | Ever had irritable mood $\geq 1$ week                                |
| DEP10     | Ever had anhedonia $\geq 1$ week                                     |
| DEP11     | Changes in weight or appetite                                        |
| DEP12     | Changes in sleep                                                     |
| DEP13     | Change in appetite, weight, sleep, or difficulty concentrating       |
| DEP14     | Anxious state                                                        |
| DEP15     | Ever had anxiety $\geq 1$ week                                       |
| DEP16     | Psychomotor agitation or retardation                                 |
| DEP17     | Psychomotor retardation (stand-alone)                                |
| DEP18     | Loss of energy or fatigue                                            |
| DEP19     | Feelings of worthlessness or inappropriate guilt                     |
| DEP21     | Feelings of worthlessness                                            |
| DEP22     | Inappropriate guilt                                                  |
| DEP23     | Impaired Concentration or Indecisiveness                             |
| DEP24     | Impaired Concentration                                               |
| DEP25     | Altered libido                                                       |
| DEP26     | Indecisiveness                                                       |
| DEP27     | Suicidality (All)                                                    |
| DEP29     | Self-harm                                                            |
| DEP31     | Worthlessness, guilt, or suicidality                                 |
| MAN2      | Elevated, expansive, or irritable mood, no time restriction (parcel) |
| MAN3      | Elevated or expansive mood $\geq 3$ days (manic)                     |
| MAN5      | Elevated, expansive, or irritable mood lasted $\geq 1$ week (manic)  |
| MAN6      | Decreased need for sleep $\geq 3$ days (manic)                       |
| MAN7      | Decreased need for sleep (manic)                                     |
| MAN8      | Inflated self-esteem or grandiosity (manic)                          |

| Item Name | Item Description                                                                                |
|-----------|-------------------------------------------------------------------------------------------------|
| MAN9      | More talkative than usual or pressured speech (manic)                                           |
| MAN10     | Racing thoughts (manic)                                                                         |
| MAN11     | Distractability (manic)                                                                         |
| MAN12     | Increased goal-directed activity or psychomotor agitation (manic)                               |
| MAN13     | Increased goal-directed activity (manic)                                                        |
| MAN14     | Psychomotor agitation (manic)                                                                   |
| MAN15     | Excessive involvement in risky activities (manic)                                               |
| MAN16     | More talkative than usual, increased goal-directed activity, or involvement in risky activities |
| MAN17     | Increased sociability                                                                           |
| MAN18     | Overly excited and hard to converse with (manic)                                                |
| DEL1      | Any delusions                                                                                   |
| DEL2      | Delusions of jealousy                                                                           |
| DEL3      | Delusions of guilt                                                                              |
| DEL4      | Religious delusions                                                                             |
| DEL5      | Persecutory delusions                                                                           |
| DEL7      | Grandiose delusions                                                                             |
| DEL8      | Delusions of mind reading                                                                       |
| DEL9      | Somatic/Nihilistic delusions                                                                    |
| DEL10     | Thought insertion                                                                               |
| DEL11     | Thought withdrawal                                                                              |
| DEL13     | Thought echo                                                                                    |
| DEL14     | Thought broadcast                                                                               |
| DEL18     | Delusions of influence/reference                                                                |
| DEL19     | Delusions of passivity/being controlled                                                         |
| DEL20     | Delusions of poverty                                                                            |
| DEL22     | Other delusions (any, stand-alone)                                                              |
| HAL1      | Auditory or visual hallucinations                                                               |
| HAL2      | Auditory hallucinations (stand-alone)                                                           |
| HAL3      | Running commentary                                                                              |
| HAL5      | Voices conversing                                                                               |
| HAL6      | Voices conversing about patient                                                                 |
| HAL7      | Commanding, accusatory, abusive, or persecutory voices                                          |
| HAL8      | Neutral voices or non-verbal hallucinations                                                     |
| HAL27     | Somatic or Tactile hallucinations                                                               |
| HAL28     | Olfactory hallucinations                                                                        |
| HAL30     | Visual hallucinations                                                                           |
| HAL31     | Other hallucinations (any)                                                                      |

| Item Name | Item Description                                       |
|-----------|--------------------------------------------------------|
| ORG1      | Any thought disorder, disorganization, or catatonia    |
| ORG2      | Bizarre clothing and/or appearance                     |
| ORG3      | Bizarre behavior and/or clothing                       |
| ORG4      | Bizarre social and sexual behavior                     |
| ORG5      | Ritualistic or stereotyped behavior                    |
| ORG6      | Aggressive and agitated behavior                       |
| ORG8      | Inappropriate affect                                   |
| ORG9      | Derailment                                             |
| ORG11     | Incoherence                                            |
| ORG12     | Positive formal thought disorder                       |
| ORG13     | Loosening of associations                              |
| ORG14     | Tangentiality                                          |
| ORG15     | Disorganized speech (incoherent, disturbed, illogical) |
| ORG19     | Circumstantiality                                      |
| ORG20     | Pressure of speech                                     |

### **Model Modifications**

After estimating models defined as above in each sample, we modified the models in the following ways. Items involving suicide or suicidal ideation were parceled to yield a summed score, where a score of zero indicates no suicidality and scores greater than zero indicate increasing severity of suicidality. All weight and appetite changes were parceled into a single variable by taking the maximum value of the component variables, such that the resulting composite represents the severity or duration (depending on the instrument) of the most severe or longest change in weight or appetite; this parcelling was repeated separately for all sleep changes and all psychomotor changes (agitation and retardation), yielding two additional composites for those sets of symptoms. The two core manic symptoms, elevated or expansive mood and irritable mood, were also parceled into a single variable, where the lowest value (zero) indicates that the patient experienced neither symptom, a score of one indicates that the patient experienced either elevated/expansive

mood or irritable mood, and a score of two indicates that the patient experienced both elevated/expansive and irritable mood. Two additional modifications were made to the DI-PAD/OPCRIT items: all mania symptoms were dichotomized, and some positive psychosis symptoms were collapsed to three categories to match the remaining positive psychosis symptoms.

The following Supplemental Tables provide pre- and post-alignment IRT parameters as follows:

- Table SB1a. Depression, pre-alignment
- Table SB1b. Depression, post-alignment
- Table SB2a. Mania, pre-alignment
- Table SB2b. Mania, post-alignment
- Table SB3a. Delusions, pre-alignment
- Table SB3b. Delusions, post-alignment
- Table SB4a. Hallucinations, pre-alignment
- Table SB4b. Hallucinations, post-alignment
- Table SB5a. Disorganization, pre-alignment
- Table SB5b. Disorganization, post-alignment

| Item Name | CASH<br>Dutch Schizophrenia<br>Unrelated Probands |       |       | DIGS & MINI<br>Colombia/Costa Rica |        | DIGS<br>Pennsylvania |       |       | GPC Screener & DI-PAD<br>Pato<br>Bipolar |      |       |       | GPC Screener & DI-PAD<br>Pato<br>Control |       |
|-----------|---------------------------------------------------|-------|-------|------------------------------------|--------|----------------------|-------|-------|------------------------------------------|------|-------|-------|------------------------------------------|-------|
|           | a1                                                | d1    | d2    | a1                                 | d1     | a1                   | d1    | d2    | a1                                       | d1   | d2    | d3    | a1                                       | d1    |
| DEP1      |                                                   |       |       | 3.50                               | -1.96  |                      |       |       |                                          |      |       |       |                                          |       |
| DEP2      |                                                   |       |       |                                    |        |                      |       |       | 1.96                                     | 2.64 |       |       | 5.17                                     | -6.03 |
| DEP5      | 2.94                                              | 2.05  |       |                                    |        |                      |       |       |                                          |      |       |       |                                          |       |
| DEP6      |                                                   |       |       | 2.75                               | -1.26  |                      |       |       |                                          |      |       |       |                                          |       |
| DEP7      |                                                   |       |       |                                    |        |                      |       |       | 1.69                                     | 2.49 |       |       | 5.80                                     | -6.96 |
| DEP8      |                                                   |       |       | 23.64                              | -11.05 | 8.63                 | -1.50 |       | 3.71                                     | 5.33 |       |       |                                          |       |
| DEP9      |                                                   |       |       | 3.91                               | -3.32  |                      |       |       | 1.05                                     | 1.26 |       |       |                                          |       |
| DEP10     |                                                   |       |       | 23.23                              | -11.97 | 5.37                 | -2.22 |       | 6.20                                     | 7.51 | 2.87  |       |                                          |       |
| DEP11     | 1.27                                              | 0.12  |       |                                    |        | 1.27                 | -0.06 | -2.40 | 2.19                                     | 2.45 | 2.27  | 1.19  |                                          |       |
| DEP12     | 1.54                                              | 0.65  |       | 10.74                              | -5.97  | 5.85                 | -2.31 |       | 2.90                                     | 3.76 | 3.17  | 1.30  |                                          |       |
| DEP13     |                                                   |       |       |                                    |        |                      |       |       | 1.69                                     | 2.49 |       |       | 6.94                                     | -8.34 |
| DEP14     | 0.71                                              | -1.15 |       | 7.75                               | -5.43  |                      |       |       |                                          |      |       |       |                                          |       |
| DEP15     |                                                   |       |       | 10.57                              | -6.80  |                      |       |       |                                          |      |       |       |                                          |       |
| DEP16     | 1.31                                              | 0.42  |       | 19.78                              | -10.84 | 4.04                 | -3.11 |       |                                          |      |       |       |                                          |       |
| DEP17     |                                                   |       |       |                                    |        |                      |       |       | 2.74                                     | 2.47 | 0.78  |       |                                          |       |
| DEP18     | 1.90                                              | 1.29  |       | 16.54                              | -8.94  | 5.37                 | -1.95 |       | 5.83                                     | 6.51 | 2.45  |       |                                          |       |
| DEP19     | 1.43                                              | 0.27  |       |                                    |        | 2.38                 | -2.71 |       |                                          |      |       |       |                                          |       |
| DEP21     |                                                   |       |       | 5.95                               | -4.55  | 4.92                 | -3.20 |       |                                          |      |       |       |                                          |       |
| DEP22     |                                                   |       |       | 6.10                               | -5.12  | 4.36                 | -3.04 |       | 2.56                                     | 2.22 | 0.72  |       |                                          |       |
| DEP23     | 1.68                                              | 1.02  |       | 16.63                              | -9.26  | 4.33                 | -2.35 |       |                                          |      |       |       |                                          |       |
| DEP24     |                                                   |       |       |                                    |        | 2.54                 | -3.22 |       | 4.26                                     | 4.75 | 1.72  |       |                                          |       |
| DEP25     |                                                   |       |       |                                    |        |                      |       |       | 0.97                                     | 0.99 | -2.94 |       |                                          |       |
| DEP26     |                                                   |       |       |                                    |        |                      |       |       |                                          |      |       |       |                                          |       |
| DEP27     | 1.28                                              | 0.43  | -1.78 | 3.09                               | -1.67  | 3.64                 | -3.20 |       | 1.10                                     | 1.10 | -0.05 | -0.77 |                                          |       |
| DEP29     |                                                   |       |       |                                    |        | 2.74                 | -4.31 |       |                                          |      |       |       |                                          |       |
| DEP31     |                                                   |       |       |                                    |        |                      |       |       | 1.42                                     | 1.59 |       |       | 4.69                                     | -7.11 |

Table SB1a. Pre-alignment parameter estimates for depression.

| Item Name | GPC Screener & DI-PAD<br>Pato<br>Other Patients |       |        | GPC Screener & DI-PAD<br>Pato<br>Schizophrenia |       |       |       | MINI<br>Texas |       |       | SCID & CASH<br>Dutch Bipolar |       |      |       |       |
|-----------|-------------------------------------------------|-------|--------|------------------------------------------------|-------|-------|-------|---------------|-------|-------|------------------------------|-------|------|-------|-------|
|           | a1                                              | d1    | d2     | a1                                             | d1    | d2    | d3    | a1            | d1    | d2    | a1                           | d1    | d2   | d3    | d4    |
| DEP1      |                                                 |       |        |                                                |       |       |       | 8.81          | -2.26 |       | 4.61                         | 6.82  |      |       |       |
| DEP2      | 4.85                                            | -1.93 |        | 2.08                                           | -0.14 |       |       |               |       |       |                              |       |      |       |       |
| DEP5      |                                                 |       |        |                                                |       |       |       |               |       |       |                              |       |      |       |       |
| DEP6      |                                                 |       |        |                                                |       |       |       | 5.39          | -2.56 |       | 4.57                         | 6.52  |      |       |       |
| DEP7      | 4.58                                            | -2.16 |        | 2.05                                           | -0.23 |       |       |               |       |       |                              |       |      |       |       |
| DEP8      | 9.19                                            | -4.46 |        | 7.80                                           | -1.08 |       |       |               |       |       |                              |       |      |       |       |
| DEP9      | 3.48                                            | -3.03 |        | 3.63                                           | -1.73 |       |       |               |       |       |                              |       |      |       |       |
| DEP10     | 11.00                                           | -6.26 | -9.10  | 9.15                                           | -2.74 | -3.86 | -5.63 |               |       |       |                              |       |      |       |       |
| DEP11     | 6.62                                            | -4.33 | -5.50  | 6.06                                           | -2.48 | -2.80 | -3.56 | 7.09          | -3.40 |       | 1.26                         | 0.85  |      |       |       |
| DEP12     | 8.70                                            | -5.25 | -7.55  | 7.47                                           | -2.43 | -3.34 | -4.62 | 7.16          | -3.31 |       | 1.89                         | 2.01  |      |       |       |
| DEP13     | 4.81                                            | -2.18 |        | 1.89                                           | -0.27 |       |       |               |       |       |                              |       |      |       |       |
| DEP14     |                                                 |       |        |                                                |       |       |       |               |       |       |                              |       |      |       |       |
| DEP15     |                                                 |       |        |                                                |       |       |       |               |       |       |                              |       |      |       |       |
| DEP16     |                                                 |       |        |                                                |       |       |       | 4.66          | -3.12 |       | 1.90                         | 1.85  |      |       |       |
| DEP17     | 4.97                                            | -4.08 | -5.07  | 4.69                                           | -2.50 | -2.90 | -4.08 |               |       |       |                              |       |      |       |       |
| DEP18     | 12.09                                           | -7.09 | -10.14 | 5.78                                           | -2.36 | -2.99 | -4.56 | 5.65          | -3.00 |       | 2.08                         | 2.52  |      |       |       |
| DEP19     |                                                 |       |        |                                                |       |       |       | 4.60          | -3.12 |       |                              |       |      |       |       |
| DEP21     |                                                 |       |        |                                                |       |       |       |               |       |       | 1.66                         | 0.68  |      |       |       |
| DEP22     | 6.00                                            | -4.71 | -5.88  | 2.13                                           | -2.06 | -2.26 | -2.82 |               |       |       | 1.26                         | -0.50 |      |       |       |
| DEP23     |                                                 |       |        |                                                |       |       |       | 4.99          | -3.43 |       |                              |       |      |       |       |
| DEP24     | 9.63                                            | -6.35 | -8.56  | 9.23                                           | -3.52 | -4.23 | -5.91 |               |       |       | 2.55                         | 2.35  |      |       |       |
| DEP25     | 3.96                                            | -3.35 |        | 3.41                                           | -1.95 | -6.69 |       |               |       |       |                              |       |      |       |       |
| DEP26     |                                                 |       |        |                                                |       |       |       |               |       |       | 1.60                         | 0.62  |      |       |       |
| DEP27     | 3.56                                            | -3.14 | -4.91  | 3.61                                           | -1.62 | -2.48 | -4.97 | 2.31          | -2.48 | -3.79 | 1.30                         | 0.88  | 0.08 | -1.13 | -2.22 |
| DEP29     |                                                 |       |        |                                                |       |       |       |               |       |       |                              |       |      |       |       |
| DEP31     | 3.83                                            | -2.47 |        | 2.01                                           | -0.75 |       |       |               |       |       |                              |       |      |       |       |

Table SB1a (continued). Pre-alignment parameter estimates for depression.

| Item Name | SCID<br>Psychosis in Finland |       |       | SCID<br>Finnish Schizophrenia |       |
|-----------|------------------------------|-------|-------|-------------------------------|-------|
|           | a1                           | d1    | d2    | a.1                           | d.1   |
| DEP1      | 6.74                         | 0.32  |       | 6.33                          | -3.06 |
| DEP2      |                              |       |       |                               |       |
| DEP5      |                              |       |       |                               |       |
| DEP6      | 10.38                        | -1.62 |       | 6.38                          | -3.67 |
| DEP7      |                              |       |       |                               |       |
| DEP8      |                              |       |       |                               |       |
| DEP9      |                              |       |       |                               |       |
| DEP10     |                              |       |       |                               |       |
| DEP11     | 2.70                         | -2.10 |       | 3.22                          | -3.85 |
| DEP12     | 3.67                         | -0.95 |       | 4.69                          | -3.43 |
| DEP13     |                              |       |       |                               |       |
| DEP14     |                              |       |       |                               |       |
| DEP15     |                              |       |       |                               |       |
| DEP16     | 4.54                         | -2.34 |       | 4.44                          | -4.58 |
| DEP17     |                              |       |       |                               |       |
| DEP18     | 3.92                         | -1.26 |       | 5.28                          | -4.11 |
| DEP19     |                              |       |       | 4.27                          | -4.11 |
| DEP21     | 3.70                         | -3.14 |       |                               |       |
| DEP22     | 2.35                         | -3.02 |       |                               |       |
| DEP23     |                              |       |       | 6.09                          | -5.15 |
| DEP24     | 4.05                         | -3.91 |       |                               |       |
| DEP25     |                              |       |       |                               |       |
| DEP26     | 3.56                         | -4.42 |       |                               |       |
| DEP27     | 3.23                         | -2.62 | -4.03 | 3.20                          | -3.51 |
| DEP29     |                              |       |       |                               |       |
| DEP31     |                              |       |       |                               |       |

Table SB1a (continued). Pre-alignment parameter estimates for depression.

| Item Name | CASH<br>Dutch Schizophrenia<br>Unrelated Probands |       |       | DIGS & MINI<br>Colombia/Costa Rica |       | DIGS<br>Pennsylvania |       |       | GPC Screener & DI-PAD<br>Pato<br>Bipolar |       |       |       | GPC Screener & DI-PAD<br>Pato<br>Control |       |
|-----------|---------------------------------------------------|-------|-------|------------------------------------|-------|----------------------|-------|-------|------------------------------------------|-------|-------|-------|------------------------------------------|-------|
|           | a1                                                | d1    | d2    | a1                                 | d1    | a1                   | d1    | d2    | a1                                       | d1    | d2    | d3    | a1                                       | d1    |
| DEP1      |                                                   |       |       | 0.41                               | -0.01 |                      |       |       |                                          |       |       |       |                                          |       |
| DEP2      |                                                   |       |       |                                    |       |                      |       |       | 0.87                                     | 0.55  |       |       | 0.85                                     | 0.76  |
| DEP5      | 2.94                                              | 2.05  |       |                                    |       |                      |       |       |                                          |       |       |       |                                          |       |
| DEP6      |                                                   |       |       | 0.33                               | 0.28  |                      |       |       |                                          |       |       |       |                                          |       |
| DEP7      |                                                   |       |       |                                    |       |                      |       |       | 0.75                                     | 0.68  |       |       | 0.96                                     | 0.65  |
| DEP8      |                                                   |       |       | 2.80                               | 2.18  | 2.81                 | 2.85  |       | 1.65                                     | 1.37  |       |       |                                          |       |
| DEP9      |                                                   |       |       | 0.46                               | -1.13 |                      |       |       | 0.47                                     | 0.14  |       |       |                                          |       |
| DEP10     |                                                   |       |       | 2.75                               | 1.02  | 1.75                 | 0.49  |       | 2.76                                     | 0.90  | -3.74 |       |                                          |       |
| DEP11     | 1.27                                              | 0.12  |       |                                    |       | 0.41                 | 0.58  | -1.76 | 0.97                                     | 0.12  | -0.06 | -1.14 |                                          |       |
| DEP12     | 1.54                                              | 0.65  |       | 1.27                               | 0.03  | 1.90                 | 0.64  |       | 1.29                                     | 0.66  | 0.07  | -1.80 |                                          |       |
| DEP13     |                                                   |       |       |                                    |       |                      |       |       | 0.75                                     | 0.69  |       |       | 1.14                                     | 0.76  |
| DEP14     | 0.71                                              | -1.15 |       | 0.92                               | -1.10 |                      |       |       |                                          |       |       |       |                                          |       |
| DEP15     |                                                   |       |       | 1.25                               | -0.90 |                      |       |       |                                          |       |       |       |                                          |       |
| DEP16     | 1.31                                              | 0.42  |       | 2.34                               | 0.22  | 1.31                 | -1.07 |       |                                          |       |       |       |                                          |       |
| DEP17     |                                                   |       |       |                                    |       |                      |       |       | 1.22                                     | -0.46 | -2.14 |       |                                          |       |
| DEP18     | 1.90                                              | 1.29  |       | 1.96                               | 0.31  | 1.74                 | 0.76  |       | 2.59                                     | 0.29  | -3.77 |       |                                          |       |
| DEP19     | 1.43                                              | 0.27  |       |                                    |       | 0.77                 | -1.51 |       |                                          |       |       |       |                                          |       |
| DEP21     |                                                   |       |       | 0.70                               | -1.23 | 1.60                 | -0.71 |       |                                          |       |       |       |                                          |       |
| DEP22     |                                                   |       |       | 0.72                               | -1.71 | 1.42                 | -0.84 |       | 1.14                                     | -0.52 | -2.01 |       |                                          |       |
| DEP23     | 1.68                                              | 1.02  |       | 1.97                               | 0.04  | 1.41                 | -0.17 |       |                                          |       |       |       |                                          |       |
| DEP24     |                                                   |       |       |                                    |       | 0.83                 | -1.93 |       | 1.89                                     | 0.21  | -2.82 |       |                                          |       |
| DEP25     |                                                   |       |       |                                    |       |                      |       |       | 0.43                                     | -0.04 | -3.98 |       |                                          |       |
| DEP26     |                                                   |       |       |                                    |       |                      |       |       |                                          |       |       |       |                                          |       |
| DEP27     | 1.28                                              | 0.43  | -1.78 | 0.37                               | 0.06  | 1.18                 | -1.36 |       | 0.49                                     | -0.07 | -1.22 | -1.95 |                                          |       |
| DEP29     |                                                   |       |       |                                    |       | 0.89                 | -2.92 |       |                                          |       |       |       |                                          |       |
| DEP31     |                                                   |       |       |                                    |       |                      |       |       | 0.63                                     | 0.08  |       |       | 0.77                                     | -0.95 |

Table SB1b. Post-alignment parameter estimates for depression.



| Item Name | GPC Screener & DI-PAD<br>Pato<br>Other Patients |       |       | GPC Screener & DI-PAD<br>Pato<br>Schizophrenia |       |       |       | MINI<br>Texas |       |       | SCID & CASH<br>Dutch Bipolar |       |       |       |       |
|-----------|-------------------------------------------------|-------|-------|------------------------------------------------|-------|-------|-------|---------------|-------|-------|------------------------------|-------|-------|-------|-------|
|           | a1                                              | d1    | d2    | a1                                             | d1    | d2    | d3    | a1            | d1    | d2    | a1                           | d1    | d2    | d3    | d4    |
| DEP1      |                                                 |       |       |                                                |       |       |       | 2.71          | 2.63  |       | 3.81                         | 2.91  |       |       |       |
| DEP2      | 0.86                                            | 1.25  |       | 0.44                                           | 0.71  |       |       |               |       |       |                              |       |       |       |       |
| DEP5      |                                                 |       |       |                                                |       |       |       |               |       |       |                              |       |       |       |       |
| DEP6      |                                                 |       |       |                                                |       |       |       | 1.66          | 0.43  |       | 3.78                         | 2.65  |       |       |       |
| DEP7      | 0.82                                            | 0.84  |       | 0.43                                           | 0.61  |       |       |               |       |       |                              |       |       |       |       |
| DEP8      | 1.64                                            | 1.56  |       | 1.64                                           | 2.11  |       |       |               |       |       |                              |       |       |       |       |
| DEP9      | 0.62                                            | -0.75 |       | 0.76                                           | -0.24 |       |       |               |       |       |                              |       |       |       |       |
| DEP10     | 1.96                                            | 0.95  | -1.89 | 1.92                                           | 1.01  | -0.11 | -1.88 |               |       |       |                              |       |       |       |       |
| DEP11     | 1.18                                            | 0.00  | -1.17 | 1.27                                           | 0.00  | -0.32 | -1.08 | 2.18          | 0.53  |       | 1.04                         | -0.21 |       |       |       |
| DEP12     | 1.55                                            | 0.45  | -1.84 | 1.57                                           | 0.63  | -0.28 | -1.56 | 2.20          | 0.66  |       | 1.56                         | 0.41  |       |       |       |
| DEP13     | 0.86                                            | 0.97  |       | 0.40                                           | 0.51  |       |       |               |       |       |                              |       |       |       |       |
| DEP14     |                                                 |       |       |                                                |       |       |       |               |       |       |                              |       |       |       |       |
| DEP15     |                                                 |       |       |                                                |       |       |       |               |       |       |                              |       |       |       |       |
| DEP16     |                                                 |       |       |                                                |       |       |       | 1.43          | -0.53 |       | 1.57                         | 0.24  |       |       |       |
| DEP17     | 0.89                                            | -0.82 | -1.81 | 0.99                                           | -0.58 | -0.98 | -2.16 |               |       |       |                              |       |       |       |       |
| DEP18     | 2.15                                            | 0.84  | -2.22 | 1.21                                           | 0.00  | -0.62 | -2.19 | 1.74          | 0.13  |       | 1.72                         | 0.76  |       |       |       |
| DEP19     |                                                 |       |       |                                                |       |       |       | 1.42          | -0.57 |       |                              |       |       |       |       |
| DEP21     |                                                 |       |       |                                                |       |       |       |               |       |       | 1.37                         | -0.72 |       |       |       |
| DEP22     | 1.07                                            | -0.79 | -1.95 | 0.45                                           | -1.19 | -1.39 | -1.95 |               |       |       | 1.04                         | -1.57 |       |       |       |
| DEP23     |                                                 |       |       |                                                |       |       |       | 1.53          | -0.66 |       |                              |       |       |       |       |
| DEP24     | 1.71                                            | -0.04 | -2.25 | 1.94                                           | 0.26  | -0.45 | -2.13 |               |       |       | 2.11                         | 0.20  |       |       |       |
| DEP25     | 0.71                                            | -0.75 |       | 0.72                                           | -0.56 | -5.29 |       |               |       |       |                              |       |       |       |       |
| DEP26     |                                                 |       |       |                                                |       |       |       |               |       |       | 1.32                         | -0.73 |       |       |       |
| DEP27     | 0.63                                            | -0.81 | -2.57 | 0.76                                           | -0.14 | -1.00 | -3.49 | 0.71          | -1.20 | -2.51 | 1.07                         | -0.22 | -1.01 | -2.22 | -3.32 |
| DEP29     |                                                 |       |       |                                                |       |       |       |               |       |       |                              |       |       |       |       |
| DEP31     | 0.68                                            | 0.04  |       | 0.42                                           | 0.07  |       |       |               |       |       |                              |       |       |       |       |

Table SB1b (continued). Post-alignment parameter estimates for depression.

| Item Name | SCID<br>Psychosis in Finland |       |       | SCID<br>Finnish Schizophrenia |       |
|-----------|------------------------------|-------|-------|-------------------------------|-------|
|           | a1                           | d1    | d2    | a1                            | d1    |
| DEP1      | 2.86                         | 3.22  |       | 2.10                          | 2.48  |
| DEP2      |                              |       |       |                               |       |
| DEP5      |                              |       |       |                               |       |
| DEP6      | 4.41                         | 2.85  |       | 2.12                          | 1.91  |
| DEP7      |                              |       |       |                               |       |
| DEP8      |                              |       |       |                               |       |
| DEP9      |                              |       |       |                               |       |
| DEP10     |                              |       |       |                               |       |
| DEP11     | 1.14                         | -0.94 |       | 1.07                          | -1.03 |
| DEP12     | 1.56                         | 0.63  |       | 1.55                          | 0.67  |
| DEP13     |                              |       |       |                               |       |
| DEP14     |                              |       |       |                               |       |
| DEP15     |                              |       |       |                               |       |
| DEP16     | 1.93                         | -0.39 |       | 1.47                          | -0.70 |
| DEP17     |                              |       |       |                               |       |
| DEP18     | 1.66                         | 0.42  |       | 1.75                          | 0.51  |
| DEP19     |                              |       |       | 1.42                          | -0.37 |
| DEP21     | 1.57                         | -1.55 |       |                               |       |
| DEP22     | 1.00                         | -2.01 |       |                               |       |
| DEP23     |                              |       |       | 2.02                          | 0.18  |
| DEP24     | 1.72                         | -2.17 |       |                               |       |
| DEP25     |                              |       |       |                               |       |
| DEP26     | 1.51                         | -2.89 |       |                               |       |
| DEP27     | 1.37                         | -1.23 | -2.64 | 1.06                          | -0.71 |
| DEP29     |                              |       |       |                               |       |
| DEP31     |                              |       |       |                               |       |

Table SB1b (continued). Post-alignment parameter estimates for depression.

| Item Name | CASH<br>Dutch Schizophrenia<br>Unrelated Probands |       | DIGS & MINI<br>Colombia/Costa Rica |        |       | GPC Screener & DI-PAD<br>Pato<br>Bipolar |      | GPC Screener & DI-PAD<br>Pato<br>Other Patients |        |        |
|-----------|---------------------------------------------------|-------|------------------------------------|--------|-------|------------------------------------------|------|-------------------------------------------------|--------|--------|
|           | a1                                                | d1    | a1                                 | d1     | d2    | a1                                       | d1   | a1                                              | d1     | d2     |
| MAN2      | 4.97                                              | -2.81 | 9.20                               | -3.72  | -6.33 |                                          |      | 10.09                                           | -9.55  | -12.79 |
| MAN3      |                                                   |       |                                    |        |       | 2.09                                     | 3.79 | 3.79                                            | -2.62  |        |
| MAN5      |                                                   |       |                                    |        |       |                                          |      |                                                 |        |        |
| MAN6      |                                                   |       |                                    |        |       | 1.74                                     | 2.65 | 3.25                                            | -2.98  |        |
| MAN7      | 3.23                                              | -1.99 | 48.33                              | -37.29 |       | 0.95                                     | 1.95 | 6.96                                            | -8.05  |        |
| MAN8      | 2.50                                              | -1.40 | 7.63                               | -6.58  |       | 0.66                                     | 0.64 | 5.81                                            | -8.34  |        |
| MAN9      | 2.29                                              | -2.01 | 47.19                              | -36.26 |       | 0.82                                     | 2.76 | 12.36                                           | -13.46 |        |
| MAN10     | 2.22                                              | -0.69 | 46.36                              | -36.12 |       | 0.58                                     | 3.23 | 21.07                                           | -22.79 |        |
| MAN11     | 1.32                                              | -0.78 | 49.64                              | -38.34 |       | 0.50                                     | 2.21 | 10.74                                           | -11.80 |        |
| MAN12     |                                                   |       | 22.45                              | -15.18 |       |                                          |      |                                                 |        |        |
| MAN13     | 3.38                                              | -1.71 |                                    |        |       | 0.94                                     | 2.76 | 12.75                                           | -14.03 |        |
| MAN14     |                                                   |       |                                    |        |       |                                          |      |                                                 |        |        |
| MAN15     | 1.95                                              | -1.81 | 11.63                              | -9.37  |       | 0.57                                     | 1.98 | 7.24                                            | -8.63  |        |
| MAN16     |                                                   |       |                                    |        |       | 2.30                                     | 3.41 | 3.62                                            | -3.07  |        |
| MAN17     |                                                   |       |                                    |        |       | 0.83                                     | 1.44 | 8.30                                            | -9.97  |        |
| MAN18     |                                                   |       | 8.87                               | -7.99  |       |                                          |      |                                                 |        |        |

Table SB2a. Pre-alignment parameter estimates for mania.

| Item Name | GPC Screener & DI-PAD<br>Pato<br>Schizoaffective |      |       | SCID & CASH<br>Dutch Bipolar |      |      | SCID<br>Finnish Schizophrenia |        |
|-----------|--------------------------------------------------|------|-------|------------------------------|------|------|-------------------------------|--------|
|           | a1                                               | d1   | d2    | a1                           | d1   | d2   | a1                            | d1     |
| MAN2      | 5.88                                             | 3.09 | -0.27 |                              |      |      |                               |        |
| MAN3      | 1.79                                             | 1.46 |       |                              |      |      |                               |        |
| MAN5      |                                                  |      |       |                              |      |      | 26.72                         | -39.13 |
| MAN6      | 1.61                                             | 0.91 |       |                              |      |      |                               |        |
| MAN7      | 4.26                                             | 0.64 |       | 1.79                         | 3.04 |      | 9.88                          | -15.79 |
| MAN8      | 3.29                                             | 0.01 |       | 1.17                         | 2.76 |      | 9.16                          | -14.47 |
| MAN9      | 6.92                                             | 1.65 |       | 1.57                         | 3.19 |      | 10.62                         | -17.56 |
| MAN10     | 8.95                                             | 3.05 |       | 1.04                         | 2.04 |      | 10.20                         | -16.01 |
| MAN11     | 6.04                                             | 1.60 |       | 0.98                         | 1.68 |      | 8.56                          | -13.84 |
| MAN12     |                                                  |      |       |                              |      |      | 19.03                         | -30.09 |
| MAN13     | 7.32                                             | 1.89 |       | 0.85                         | 1.69 |      |                               |        |
| MAN14     |                                                  |      |       | 0.56                         | 0.18 |      |                               |        |
| MAN15     | 5.69                                             | 1.25 |       | 0.80                         | 0.63 | 0.38 | 6.65                          | -11.62 |
| MAN16     | 1.71                                             | 1.05 |       |                              |      |      |                               |        |
| MAN17     | 3.94                                             | 0.08 |       |                              |      |      |                               |        |
| MAN18     |                                                  |      |       |                              |      |      |                               |        |

Table SB2a (continued). Pre-alignment parameter estimates for mania.

| Item Name | CASH<br>Dutch Schizophrenia<br>Unrelated Probands |       | DIGS & MINI<br>Colombia/Costa Rica |       |      | GPC Screener & DI-PAD<br>Pato<br>Bipolar |       | GPC Screener & DI-PAD<br>Pato<br>Other Patients |       |       |
|-----------|---------------------------------------------------|-------|------------------------------------|-------|------|------------------------------------------|-------|-------------------------------------------------|-------|-------|
|           | a1                                                | d1    | a1                                 | d1    | d2   | a1                                       | d1    | a1                                              | d1    | d2    |
| MAN2      | 4.97                                              | -2.81 | 0.62                               | 3.20  | 0.59 |                                          |       | 2.35                                            | 0.68  | -2.55 |
| MAN3      |                                                   |       |                                    |       |      | 7.14                                     | -4.89 | 0.88                                            | 1.22  |       |
| MAN5      |                                                   |       |                                    |       |      |                                          |       |                                                 |       |       |
| MAN6      |                                                   |       |                                    |       |      | 5.96                                     | -4.59 | 0.76                                            | 0.31  |       |
| MAN7      | 3.23                                              | -1.99 | 3.24                               | -0.97 |      | 3.26                                     | -2.02 | 1.62                                            | -0.99 |       |
| MAN8      | 2.50                                              | -1.40 | 0.51                               | -0.84 |      | 2.24                                     | -2.08 | 1.35                                            | -2.45 |       |
| MAN9      | 2.29                                              | -2.01 | 3.16                               | -0.79 |      | 2.80                                     | -0.65 | 2.88                                            | -0.93 |       |
| MAN10     | 2.22                                              | -0.69 | 3.10                               | -1.28 |      | 1.98                                     | 0.82  | 4.91                                            | -1.43 |       |
| MAN11     | 1.32                                              | -0.78 | 3.32                               | -1.03 |      | 1.70                                     | 0.14  | 2.50                                            | -0.92 |       |
| MAN12     |                                                   |       | 1.50                               | 1.69  |      |                                          |       |                                                 |       |       |
| MAN13     | 3.38                                              | -1.71 |                                    |       |      | 3.21                                     | -1.14 | 2.97                                            | -1.10 |       |
| MAN14     |                                                   |       |                                    |       |      |                                          |       |                                                 |       |       |
| MAN15     | 1.95                                              | -1.81 | 0.78                               | -0.63 |      | 1.95                                     | -0.40 | 1.69                                            | -1.29 |       |
| MAN16     |                                                   |       |                                    |       |      | 7.85                                     | -6.14 | 0.84                                            | 0.59  |       |
| MAN17     |                                                   |       |                                    |       |      | 2.85                                     | -2.02 | 1.93                                            | -1.55 |       |
| MAN18     |                                                   |       | 0.59                               | -1.32 |      |                                          |       |                                                 |       |       |

Table SB2b. Post-alignment parameter estimates for mania.

| Item Name | GPC Screener & DI-PAD<br>Pato<br>Schizoaffective |       |       | SCID & CASH<br>Dutch Bipolar |       |       | SCID<br>Finnish Schizophrenia |       |
|-----------|--------------------------------------------------|-------|-------|------------------------------|-------|-------|-------------------------------|-------|
|           | a1                                               | d1    | d2    | a1                           | d1    | d2    | a1                            | d1    |
| MAN2      | 2.40                                             | 0.63  | -2.74 |                              |       |       |                               |       |
| MAN3      | 0.73                                             | 0.71  |       |                              |       |       |                               |       |
| MAN5      |                                                  |       |       |                              |       |       | 7.85                          | 0.98  |
| MAN6      | 0.66                                             | 0.24  |       |                              |       |       |                               |       |
| MAN7      | 1.74                                             | -1.14 |       | 3.29                         | -1.90 |       | 2.90                          | -0.96 |
| MAN8      | 1.34                                             | -1.37 |       | 2.15                         | -0.47 |       | 2.69                          | -0.71 |
| MAN9      | 2.82                                             | -1.25 |       | 2.89                         | -1.14 |       | 3.12                          | -1.62 |
| MAN10     | 3.65                                             | -0.70 |       | 1.91                         | -0.83 |       | 3.00                          | -0.70 |
| MAN11     | 2.46                                             | -0.94 |       | 1.80                         | -1.03 |       | 2.52                          | -0.99 |
| MAN12     |                                                  |       |       |                              |       |       | 5.59                          | -1.52 |
| MAN13     | 2.98                                             | -1.18 |       | 1.56                         | -0.65 |       |                               |       |
| MAN14     |                                                  |       |       | 1.03                         | -1.36 |       |                               |       |
| MAN15     | 2.32                                             | -1.13 |       | 1.48                         | -1.59 | -1.84 | 1.95                          | -1.65 |
| MAN16     | 0.70                                             | 0.33  |       |                              |       |       |                               |       |
| MAN17     | 1.61                                             | -1.57 |       |                              |       |       |                               |       |
| MAN18     |                                                  |       |       |                              |       |       |                               |       |

Table SB2b (continued). Post-alignment parameter estimates for mania.

| Item Name | CASH<br>Dutch Schizophrenia<br>Unrelated Proband |       | GPC Screener & DI-PAD<br>Pato<br>Bipolar |       |       | GPC Screener & DI-PAD<br>Pato<br>Schizophrenia |       |       | GPC Screener & DI-PAD<br>Pato<br>Schizo affective |       |       |
|-----------|--------------------------------------------------|-------|------------------------------------------|-------|-------|------------------------------------------------|-------|-------|---------------------------------------------------|-------|-------|
|           | a1                                               | d1    | a1                                       | d1    | d2    | a1                                             | d1    | d2    | a1                                                | d1    | d2    |
| DEL1      |                                                  |       | 1.71                                     | 0.20  |       | 0.89                                           | 1.45  |       | 0.80                                              | 1.81  |       |
| DEL2      | 0.53                                             | -2.15 |                                          |       |       |                                                |       |       |                                                   |       |       |
| DEL3      | 0.59                                             | -0.97 | 1.81                                     | -2.89 | -3.55 | 1.08                                           | -1.49 | -2.02 | 1.09                                              | -1.04 | -1.39 |
| DEL4      | 0.80                                             | -0.77 |                                          |       |       |                                                |       |       |                                                   |       |       |
| DEL5      | 0.59                                             | 1.60  | 1.91                                     | -0.31 | -2.98 | 0.64                                           | 2.15  |       | 0.73                                              | 2.08  | 1.90  |
| DEL7      | 0.79                                             | 0.04  | 1.39                                     | -1.04 | -1.48 | 0.53                                           | -0.57 | -0.73 | 0.44                                              | 0.19  | -0.02 |
| DEL8      | 1.92                                             | -0.12 |                                          |       |       |                                                |       |       |                                                   |       |       |
| DEL9      | 0.55                                             | -1.05 | 1.61                                     | -3.78 | -4.33 | 0.77                                           | -2.17 | -2.52 | 0.58                                              | -1.97 | -2.23 |
| DEL10     | 2.40                                             | -1.63 | 2.64                                     | -3.00 | -5.39 | 1.67                                           | 0.13  | -0.01 | 1.54                                              | 0.34  | 0.03  |
| DEL11     | 2.28                                             | -2.56 | 2.53                                     | -4.35 | -6.20 | 1.54                                           | -1.38 | -1.53 | 1.87                                              | -1.38 | -1.63 |
| DEL13     |                                                  |       | 2.08                                     | -2.92 | -4.72 | 0.88                                           | -1.26 | -1.53 | 0.93                                              | -0.51 | -0.86 |
| DEL14     | 1.68                                             | -0.99 | 2.20                                     | -2.42 | -4.48 | 1.50                                           | 0.13  | -0.13 | 1.68                                              | 0.37  | -0.01 |
| DEL18     | 0.77                                             | 1.33  | 2.36                                     | -1.58 | -4.08 | 1.21                                           | 1.19  |       | 1.21                                              | 1.15  | 0.97  |
| DEL19     | 1.42                                             | -0.82 | 2.69                                     | -3.71 | -5.76 | 1.42                                           | -0.36 | -0.42 | 1.37                                              | -0.23 | -0.36 |
| DEL20     |                                                  |       | 1.48                                     | -3.56 | -4.08 | 0.99                                           | -2.64 | -3.29 | 0.84                                              | -2.22 | -2.52 |
| DEL22     |                                                  |       |                                          |       |       |                                                |       |       |                                                   |       |       |

Table SB3a. Pre-alignment parameter estimates for delusions.

| Item Name | SCID & CASH<br>Dutch Bipolar |       |       | SCID<br>Finnish<br>Schizophrenia |       |
|-----------|------------------------------|-------|-------|----------------------------------|-------|
|           | a1                           | d1    | d2    | a1                               | d1    |
| DEL1      |                              |       |       |                                  |       |
| DEL2      | 0.94                         | -3.60 |       |                                  |       |
| DEL3      | 1.12                         | -2.83 |       |                                  |       |
| DEL4      | 1.21                         | -1.82 |       |                                  |       |
| DEL5      | 1.17                         | -0.94 | -1.22 | 4.00                             | -2.58 |
| DEL7      | 1.57                         | -0.14 |       | 2.45                             | -2.87 |
| DEL8      | 2.76                         | -4.73 |       |                                  |       |
| DEL9      | 1.04                         | -2.69 |       | 2.05                             | -2.90 |
| DEL10     | 4.94                         | -7.47 |       |                                  |       |
| DEL11     |                              |       |       |                                  |       |
| DEL13     |                              |       |       |                                  |       |
| DEL14     | 2.29                         | -3.61 |       |                                  |       |
| DEL18     | 1.67                         | -0.15 | -0.42 | 3.61                             | -2.65 |
| DEL19     | 4.50                         | -6.00 |       |                                  |       |
| DEL20     |                              |       |       |                                  |       |
| DEL22     |                              |       |       | 3.77                             | -1.98 |

Table SB3a (continued). Pre-alignment parameter estimates for delusions.



| Item Name | CASH<br>Dutch Schizophrenia<br>Unrelated Probands |       | GPC Screener & DI-PAD<br>Pato<br>Bipolar |       |       | GPC Screener & DI-PAD<br>Pato<br>Schizophrenia |       |       | GPC Screener & DI-PAD<br>Pato<br>Schizoaffective |       |       |
|-----------|---------------------------------------------------|-------|------------------------------------------|-------|-------|------------------------------------------------|-------|-------|--------------------------------------------------|-------|-------|
|           | a1                                                | d1    | a1                                       | d1    | d2    | a1                                             | d1    | d2    | a1                                               | d1    | d2    |
| DEL1      |                                                   |       | 0.91                                     | 1.89  |       | 0.89                                           | 1.20  |       | 0.81                                             | 1.49  |       |
| DEL2      | 0.53                                              | -2.15 |                                          |       |       |                                                |       |       |                                                  |       |       |
| DEL3      | 0.59                                              | -0.97 | 0.96                                     | -1.10 | -1.76 | 1.08                                           | -1.79 | -2.32 | 1.11                                             | -1.48 | -1.83 |
| DEL4      | 0.80                                              | -0.77 |                                          |       |       |                                                |       |       |                                                  |       |       |
| DEL5      | 0.59                                              | 1.60  | 1.02                                     | 1.58  | -1.09 | 0.64                                           | 1.98  |       | 0.74                                             | 1.79  | 1.61  |
| DEL7      | 0.79                                              | 0.04  | 0.74                                     | 0.33  | -0.11 | 0.52                                           | -0.72 | -0.88 | 0.45                                             | 0.01  | -0.20 |
| DEL8      | 1.92                                              | -0.12 |                                          |       |       |                                                |       |       |                                                  |       |       |
| DEL9      | 0.55                                              | -1.05 | 0.86                                     | -2.19 | -2.74 | 0.76                                           | -2.39 | -2.74 | 0.59                                             | -2.21 | -2.47 |
| DEL10     | 2.40                                              | -1.63 | 1.41                                     | -0.38 | -2.78 | 1.66                                           | -0.33 | -0.47 | 1.56                                             | -0.28 | -0.59 |
| DEL11     | 2.28                                              | -2.56 | 1.35                                     | -1.84 | -3.69 | 1.53                                           | -1.80 | -1.95 | 1.89                                             | -2.13 | -2.38 |
| DEL13     |                                                   |       | 1.11                                     | -0.86 | -2.66 | 0.88                                           | -1.51 | -1.77 | 0.94                                             | -0.88 | -1.23 |
| DEL14     | 1.68                                              | -0.99 | 1.17                                     | -0.24 | -2.30 | 1.49                                           | -0.29 | -0.55 | 1.71                                             | -0.31 | -0.68 |
| DEL18     | 0.77                                              | 1.33  | 1.26                                     | 0.76  | -1.74 | 1.21                                           | 0.85  |       | 1.22                                             | 0.66  | 0.48  |
| DEL19     | 1.42                                              | -0.82 | 1.43                                     | -1.05 | -3.09 | 1.41                                           | -0.75 | -0.81 | 1.39                                             | -0.78 | -0.91 |
| DEL20     |                                                   |       | 0.79                                     | -2.09 | -2.61 | 0.98                                           | -2.91 | -3.56 | 0.86                                             | -2.56 | -2.86 |
| DEL22     |                                                   |       |                                          |       |       |                                                |       |       |                                                  |       |       |

Table SB3b. Post-alignment parameter estimates for delusions.

| Item Name | SCID & CASH<br>Dutch Bipolar |       |      | SCID<br>Finnish<br>Schizophrenia |       |
|-----------|------------------------------|-------|------|----------------------------------|-------|
|           | a1                           | d1    | d2   | a1                               | d1    |
| DEL1      |                              |       |      |                                  |       |
| DEL2      | 0.50                         | -2.50 |      |                                  |       |
| DEL3      | 0.59                         | -1.53 |      |                                  |       |
| DEL4      | 0.64                         | -0.41 |      |                                  |       |
| DEL5      | 0.62                         | 0.42  | 0.14 | 1.29                             | 1.59  |
| DEL7      | 0.83                         | 1.70  |      | 0.79                             | -0.32 |
| DEL8      | 1.46                         | -1.50 |      |                                  |       |
| DEL9      | 0.55                         | -1.48 |      | 0.66                             | -0.77 |
| DEL10     | 2.61                         | -1.70 |      |                                  |       |
| DEL11     |                              |       |      |                                  |       |
| DEL13     |                              |       |      |                                  |       |
| DEL14     | 1.21                         | -0.94 |      |                                  |       |
| DEL18     | 0.88                         | 1.80  | 1.53 | 1.16                             | 1.11  |
| DEL19     | 2.38                         | -0.75 |      |                                  |       |
| DEL20     |                              |       |      |                                  |       |
| DEL22     |                              |       |      | 1.22                             | 1.95  |

Table SB3b (continued). Post-alignment parameter estimates for delusions.

| Item Name | CASH<br>Dutch Schizophrenia<br>Unrelated Proband |       | GPC Screener & DI-PAD<br>Pato<br>Bipolar |       |       | GPC Screener & DI-PAD<br>Pato<br>Schizophrenia |       |       | GPC Screener & DI-PAD<br>Pato<br>Schizoaffective |       |       |
|-----------|--------------------------------------------------|-------|------------------------------------------|-------|-------|------------------------------------------------|-------|-------|--------------------------------------------------|-------|-------|
|           | a1                                               | d1    | a1                                       | d1    | d2    | a1                                             | d1    | d2    | a1                                               | d1    | d2    |
| HAL1      |                                                  |       | 3.50                                     | 0.08  |       | 1.43                                           | 2.07  |       | 1.30                                             | 2.48  |       |
| HAL2      |                                                  |       |                                          |       |       |                                                |       |       |                                                  |       |       |
| HAL3      | 3.06                                             | -0.66 | 4.09                                     | -4.23 | -6.98 | 2.85                                           | 0.43  | 0.37  | 2.72                                             | 0.88  | 0.67  |
| HAL5      | 2.31                                             | -1.42 |                                          |       |       |                                                |       |       |                                                  |       |       |
| HAL6      |                                                  |       | 3.01                                     | -4.16 | -6.26 | 1.71                                           | -0.36 | -0.41 | 1.52                                             | -0.21 | -0.38 |
| HAL7      |                                                  |       | 3.57                                     | -2.52 | -5.72 | 1.68                                           | 1.83  |       | 2.27                                             | 2.40  | 2.09  |
| HAL8      |                                                  |       | 2.08                                     | -1.21 | -3.86 | 1.05                                           | 0.40  | 0.26  | 0.90                                             | 0.96  | 0.66  |
| HAL27     | 0.84                                             | -0.95 |                                          |       |       |                                                |       |       |                                                  |       |       |
| HAL28     | 0.80                                             | -1.41 |                                          |       |       |                                                |       |       |                                                  |       |       |
| HAL30     | 0.85                                             | -0.12 |                                          |       |       |                                                |       |       |                                                  |       |       |
| HAL31     |                                                  |       |                                          |       |       |                                                |       |       |                                                  |       |       |

Table SB4a. Pre-alignment parameter estimates for hallucinations.

| Item Name | SCID & CASH<br>Dutch Bipolar |       | SCID<br>Finnish Schizophrenia |       |
|-----------|------------------------------|-------|-------------------------------|-------|
|           | a1                           | d1    | a1                            | d1    |
| HAL1      |                              |       |                               |       |
| HAL2      |                              |       | 4.36                          | -1.71 |
| HAL3      | 2.20                         | -3.61 |                               |       |
| HAL5      | 2.26                         | -4.28 |                               |       |
| HAL6      |                              |       |                               |       |
| HAL7      |                              |       |                               |       |
| HAL8      |                              |       |                               |       |
| HAL27     | 1.18                         | -2.61 | 1.83                          | -3.33 |
| HAL28     | 1.33                         | -2.79 |                               |       |
| HAL30     | 1.45                         | -1.03 | 3.26                          | -2.53 |
| HAL31     |                              |       | 1.32                          | -3.36 |

*Table SB4a (continued).* Pre-alignment parameter estimates for hallucinations.

| Item Name | CASH<br>Dutch Schizophrenia<br>Unrelated Proband |       | GPC Screener & DI-PAD<br>Pato<br>Bipolar |       |       | GPC Screener & DI-PAD<br>Pato<br>Schizophrenia |       |       | GPC Screener & DI-PAD<br>Pato<br>Schizoaffective |       |       |
|-----------|--------------------------------------------------|-------|------------------------------------------|-------|-------|------------------------------------------------|-------|-------|--------------------------------------------------|-------|-------|
|           | a1                                               | d1    | a1                                       | d1    | d2    | a1                                             | d1    | d2    | a1                                               | d1    | d2    |
| HAL1      |                                                  |       | 2.55                                     | 3.14  |       | 1.53                                           | 1.51  |       | 1.47                                             | 1.73  |       |
| HAL2      |                                                  |       |                                          |       |       |                                                |       |       |                                                  |       |       |
| HAL3      | 3.06                                             | -0.66 | 2.98                                     | -0.67 | -3.41 | 3.05                                           | -0.68 | -0.75 | 3.08                                             | -0.68 | -0.89 |
| HAL5      | 2.31                                             | -1.42 |                                          |       |       |                                                |       |       |                                                  |       |       |
| HAL6      |                                                  |       | 2.19                                     | -1.54 | -3.63 | 1.83                                           | -1.03 | -1.08 | 1.72                                             | -1.09 | -1.26 |
| HAL7      |                                                  |       | 2.60                                     | 0.60  | -2.60 | 1.80                                           | 1.18  |       | 2.58                                             | 1.10  | 0.79  |
| HAL8      |                                                  |       | 1.51                                     | 0.60  | -2.04 | 1.12                                           | -0.01 | -0.15 | 1.02                                             | 0.44  | 0.15  |
| HAL27     | 0.84                                             | -0.95 |                                          |       |       |                                                |       |       |                                                  |       |       |
| HAL28     | 0.80                                             | -1.41 |                                          |       |       |                                                |       |       |                                                  |       |       |
| HAL30     | 0.85                                             | -0.12 |                                          |       |       |                                                |       |       |                                                  |       |       |
| HAL31     |                                                  |       |                                          |       |       |                                                |       |       |                                                  |       |       |

Table SB4b. Post-alignment parameter estimates for hallucinations.

| Item Name | SCID & CASH<br>Dutch Bipolar |       | SCID<br>Finnish Schizophrenia |       |
|-----------|------------------------------|-------|-------------------------------|-------|
|           | a1                           | d1    | a1                            | d1    |
| HAL1      |                              |       |                               |       |
| HAL2      |                              |       | 2.67                          | 2.90  |
| HAL3      | 3.02                         | -0.69 |                               |       |
| HAL5      | 3.11                         | -1.28 |                               |       |
| HAL6      |                              |       |                               |       |
| HAL7      |                              |       |                               |       |
| HAL8      |                              |       |                               |       |
| HAL27     | 1.62                         | -1.04 | 1.12                          | -1.40 |
| HAL28     | 1.82                         | -1.03 |                               |       |
| HAL30     | 1.99                         | 0.89  | 1.99                          | 0.91  |
| HAL31     |                              |       | 0.81                          | -1.96 |

*Table SB4b (continued).* Post-alignment parameter estimates for hallucinations.

| Item Name | CASH<br>Dutch Schizophrenia<br>Unrelated Probands |       | GPC Screener & DI-PAD<br>Pato<br>Bipolar |       |       |       | GPC Screener & DI-PAD<br>Pato<br>Schizophrenia |       |       |       |
|-----------|---------------------------------------------------|-------|------------------------------------------|-------|-------|-------|------------------------------------------------|-------|-------|-------|
|           | a1                                                | d1    | a1                                       | d1    | d2    | d3    | a1                                             | d1    | d2    | d3    |
| ORG1      |                                                   |       | 0.45                                     | -0.17 |       |       | 0.54                                           | 0.38  |       |       |
| ORG2      | 0.34                                              | -1.43 |                                          |       |       |       |                                                |       |       |       |
| ORG3      |                                                   |       | 1.68                                     | -2.31 |       |       | 1.35                                           | -0.31 |       |       |
| ORG4      | 0.42                                              | -0.42 |                                          |       |       |       |                                                |       |       |       |
| ORG5      | 0.32                                              | -1.48 |                                          |       |       |       |                                                |       |       |       |
| ORG6      | 0.29                                              | -0.18 | 1.30                                     | -0.40 | -0.76 | -1.63 | 0.43                                           | -2.00 | -2.33 | -2.59 |
| ORG8      | 0.90                                              | -2.71 | 1.50                                     | -3.09 | -3.76 |       | 1.61                                           | -2.02 | -2.38 |       |
| ORG9      | 2.97                                              | -4.47 | 1.69                                     | -3.94 |       |       | 2.00                                           | -2.22 |       |       |
| ORG11     |                                                   |       |                                          |       |       |       | 2.77                                           | -4.78 | -5.02 |       |
| ORG12     |                                                   |       | 1.95                                     | -2.18 | -2.93 |       | 1.92                                           | -0.97 | -1.11 |       |
| ORG13     |                                                   |       |                                          |       |       |       |                                                |       |       |       |
| ORG14     |                                                   |       |                                          |       |       |       |                                                |       |       |       |
| ORG15     | 2.00                                              | -2.83 |                                          |       |       |       |                                                |       |       |       |
| ORG19     | 3.98                                              | -3.97 |                                          |       |       |       |                                                |       |       |       |
| ORG20     | 3.08                                              | -3.88 |                                          |       |       |       |                                                |       |       |       |

Table SB5a. Pre-alignment parameter estimates for disorganization.

| Item Name | GPC Screener & DI-PAD<br>Pato<br>Schizoaffective |       |       |      | SCID & CASH<br>Dutch Bipolar |       |        |
|-----------|--------------------------------------------------|-------|-------|------|------------------------------|-------|--------|
|           | a1                                               | d1    | d2    | d3   | a1                           | d1    | d2     |
| ORG1      | 0.06                                             | 0.68  |       |      |                              |       |        |
| ORG2      |                                                  |       |       |      | 0.63                         | -1.23 |        |
| ORG3      | 1.23                                             | -0.56 |       |      |                              |       |        |
| ORG4      |                                                  |       |       |      | 0.88                         | -0.23 |        |
| ORG5      |                                                  |       |       |      | 0.52                         | -2.17 |        |
| ORG6      | 0.73                                             | 1.08  | 0.81  | 0.34 | 0.74                         | 0.04  |        |
| ORG8      | 1.49                                             | -2.07 | -2.39 |      |                              |       |        |
| ORG9      | 1.45                                             | -2.27 |       |      | 5.48                         | -7.97 |        |
| ORG11     | 3.23                                             | -6.22 |       |      |                              |       |        |
| ORG12     | 1.34                                             | -0.56 |       |      |                              |       |        |
| ORG13     |                                                  |       |       |      | 0.84                         | 0.38  |        |
| ORG14     |                                                  |       |       |      | 6.11                         | -8.61 | -10.51 |
| ORG15     |                                                  |       |       |      |                              |       |        |
| ORG19     |                                                  |       |       |      | 2.21                         | -3.35 | -4.65  |
| ORG20     |                                                  |       |       |      |                              |       |        |

Table SB5a (continued). Pre-alignment parameter estimates for disorganization.



| Item Name | CASH<br>Dutch Schizophrenia<br>Unrelated Probands |       | GPC Screener & DI-PAD<br>Pato<br>Bipolar |       |       |       | GPC Screener & DI-PAD<br>Pato<br>Schizophrenia |       |       |       |
|-----------|---------------------------------------------------|-------|------------------------------------------|-------|-------|-------|------------------------------------------------|-------|-------|-------|
|           | a1                                                | d1    | a1                                       | d1    | d2    | d3    | a1                                             | d1    | d2    | d3    |
| ORG1      |                                                   |       | 0.69                                     | -0.06 |       |       | 0.80                                           | 0.04  |       |       |
| ORG2      | 0.34                                              | -1.43 |                                          |       |       |       |                                                |       |       |       |
| ORG3      |                                                   |       | 2.57                                     | -1.89 |       |       | 2.01                                           | -1.18 |       |       |
| ORG4      | 0.42                                              | -0.42 |                                          |       |       |       |                                                |       |       |       |
| ORG5      | 0.32                                              | -1.48 |                                          |       |       |       |                                                |       |       |       |
| ORG6      | 0.29                                              | -0.18 | 2.00                                     | -0.07 | -0.44 | -1.30 | 0.64                                           | -2.28 | -2.60 | -2.87 |
| ORG8      | 0.90                                              | -2.71 | 2.30                                     | -2.71 | -3.38 |       | 2.39                                           | -3.05 | -3.41 |       |
| ORG9      | 2.97                                              | -4.47 | 2.58                                     | -3.52 |       |       | 2.97                                           | -3.50 |       |       |
| ORG11     |                                                   |       |                                          |       |       |       | 4.10                                           | -6.55 | -6.79 |       |
| ORG12     |                                                   |       | 2.98                                     | -1.69 | -2.44 |       | 2.85                                           | -2.20 | -2.34 |       |
| ORG13     |                                                   |       |                                          |       |       |       |                                                |       |       |       |
| ORG14     |                                                   |       |                                          |       |       |       |                                                |       |       |       |
| ORG15     | 2.00                                              | -2.83 |                                          |       |       |       |                                                |       |       |       |
| ORG19     | 3.98                                              | -3.97 |                                          |       |       |       |                                                |       |       |       |
| ORG20     | 3.08                                              | -3.88 |                                          |       |       |       |                                                |       |       |       |

Table SB5b. Post-alignment parameter estimates for disorganization.

| Item Name | GPC Screener & DI-PAD<br>Pato<br>Schizoaffective |       |       |       | SCID & CASH<br>Dutch Bipolar |       |       |
|-----------|--------------------------------------------------|-------|-------|-------|------------------------------|-------|-------|
|           | a1                                               | d1    | d2    | d3    | a1                           | d1    | d2    |
| ORG1      | 0.12                                             | 0.63  |       |       |                              |       |       |
| ORG2      |                                                  |       |       |       | 0.34                         | -0.72 |       |
| ORG3      | 2.49                                             | -1.59 |       |       |                              |       |       |
| ORG4      |                                                  |       |       |       | 0.48                         | 0.49  |       |
| ORG5      |                                                  |       |       |       | 0.28                         | -1.75 |       |
| ORG6      | 1.48                                             | 0.47  | 0.20  | -0.27 | 0.40                         | 0.64  |       |
| ORG8      | 3.02                                             | -3.31 | -3.64 |       |                              |       |       |
| ORG9      | 2.94                                             | -3.48 |       |       | 2.97                         | -3.52 |       |
| ORG11     | 6.52                                             | -8.91 |       |       |                              |       |       |
| ORG12     | 2.71                                             | -1.68 |       |       |                              |       |       |
| ORG13     |                                                  |       |       |       | 0.45                         | 1.06  |       |
| ORG14     |                                                  |       |       |       | 3.31                         | -3.65 | -5.55 |
| ORG15     |                                                  |       |       |       |                              |       |       |
| ORG19     |                                                  |       |       |       | 1.20                         | -1.56 | -2.86 |
| ORG20     |                                                  |       |       |       |                              |       |       |

Table SB5b (continued). Post-alignment parameter estimates for disorganization.
